# Supplementary material for: Sex based subgroup differences in randomized controlled trials: empirical evidence from Cochrane meta-analyses
Source: PubMed Central journal article supplement — BMJ. 2016 Nov 24;355:i5826. doi: 10.1136/bmj.i5826 (PMC5122320; doi:10.1136/bmj.i5826), 2016-11-24
Supplement: walj034559.wt1_default.pdf [file walj034559.wt1_default.pdf]

| Supplementary Table 1. Characteristics of 109 topics |                                                                                                                  |                                                                                   |                                                                                                     |
|------------------------------------------------------|------------------------------------------------------------------------------------------------------------------|-----------------------------------------------------------------------------------|-----------------------------------------------------------------------------------------------------|
| CD Number (year)                                     | Types of participants                                                                                            | Comparison(s)                                                                     | Outcome (Analysis or figure number)                                                                 |
| CD006562 (2010)                                      | Nonimmunocompromised women and men, aged 18 years or above, with genital warts                                   | 5-Fluorouracil vs. Placebo                                                        | Cure (1.1)                                                                                          |
|                                                      |                                                                                                                  |                                                                                   | Partial response / Melhora (1.3)                                                                    |
|                                                      |                                                                                                                  |                                                                                   | Absence of response (1.4)                                                                           |
| CD005176 (2010)                                      | Adults, aged 18 or above, with down syndrome                                                                     | Aerobic exercise training programmes vs. no intervention (data collected at rest) | Average power for knee extensions (3.20)<br>Average power for knee flexion (3.21)                   |
| CD007189 (2012)                                      | HIV-uninfected high-risk individuals                                                                             | Tenofovir disoproxil fumarate + emtricitabine vs. placebo                         | HIV infection (Fig. 6 = 1.2)                                                                        |
| CD001081 (2011)                                      | Patients with a recent symptomatic carotid stenosis (i.e. transient ischaemic attack or non-disabling stroke).   | Surgery (carotid endarterectomy) vs. no surgery                                   | 5 years cumulative risk of ipsilateral carotid ischaemic stroke and any stroke within 30 days (2.1) |
| CD000284 (2014)                                      | People with schizophrenia and non-affective serious/chronic mental illness irrespective of mode of diagnosis     | Chlorpromazine vs. placebo                                                        | Behaviour: Deteriorated/disturbed/uncooperative (1.21)                                              |
| CD009938 (2015)                                      | People with patent foramen ovale and history of cryptogenic stroke or transient ischemic attack                  | Closure (transcatheter device closure) vs. medical therapy                        | Composite of recurrent stroke or transient ischaemic attack (1.3)                                   |
| CD006221 (2006)                                      | Healthy elderly people not diagnosed as suffering from dementia or other relevant disease (including depression) | Dehydroepiandrosterone (50mg/day) vs. placebo for 3 months                        | Beck Depression Inventory (1.8, 4.1)                                                                |
|                                                      |                                                                                                                  |                                                                                   | SF-36 Physical (1.9, 4.2)                                                                           |
|                                                      |                                                                                                                  |                                                                                   | SF-36 Mental (1.10, 4.3)                                                                            |
|                                                      |                                                                                                                  |                                                                                   | Life Satisfaction Index-Z (1.11, 4.4)                                                               |
|                                                      |                                                                                                                  |                                                                                   | Satisfaction with Life Scale (1.12, 4.5)                                                            |
|                                                      |                                                                                                                  |                                                                                   | Beck Depression Inventory (2.7, 5.7)                                                                |
|                                                      |                                                                                                                  | Dehydroepiandrosterone (50mg/day) vs. placebo for 12 months                       | SF-36 Physical (2.8, 5.8)                                                                           |
|                                                      |                                                                                                                  |                                                                                   | SF-36 Mental (2.9, 5.9)                                                                             |
|                                                      |                                                                                                                  |                                                                                   | Life Satisfaction Index-Z (2.10, 5.10)                                                              |
|                                                      |                                                                                                                  |                                                                                   | Satisfaction with Life Scale (2.11, 5.11)                                                           |
|                                                      |                                                                                                                  |                                                                                   | Total cholesterol (2.1)                                                                             |
|                                                      |                                                                                                                  |                                                                                   | Total dietary fat (2.2)                                                                             |
| CD002128 (2013)                                      | Healthy adults, age 18 years or older                                                                            | Dietary advice vs. control                                                        | Fruit & vegetable servings/day (2.3)                                                                |
| CD002141 (2012)                                      | Healthy people, all ages                                                                                         | Vitamin C vs. placebo                                                             | Incidence lung cancer (2.1)                                                                         |
|                                                      |                                                                                                                  | Vitamin E vs. placebo                                                             | Mortality all cancers (3.4)                                                                         |
|                                                      |                                                                                                                  | Vitamins A, C, E + selenium + zinc vs. placebo                                    | Incidence lung cancer (8.1)                                                                         |
|                                                      |                                                                                                                  |                                                                                   | Mortality all causes (8.3)                                                                          |
| CD004815 (2016)                                      | Patients with unstable angina and non-ST elevation myocardial infarction                                         | Early invasive vs. conservative strategies                                        | Intermediate Death or Non-Fatal myocardial infarction (1.12)                                        |
| CD004148 (2007)                                      | Primary care populations                                                                                         | Brief alcohol intervention vs. control                                            | Quantity of drinking (g/week) (1.6)                                                                 |
|                                                      |                                                                                                                  |                                                                                   | Laboratory markers gamma-glutamyltransferase (IU/l) (1.16)                                          |
|                                                      |                                                                                                                  |                                                                                   | Laboratory markers mean corpuscular volume (fl) (1.17)                                              |

|                                                |                                                                                                                                                                      |                                                                              |                                                                                              |
|------------------------------------------------|----------------------------------------------------------------------------------------------------------------------------------------------------------------------|------------------------------------------------------------------------------|----------------------------------------------------------------------------------------------|
|                                                |                                                                                                                                                                      | Extended vs. brief intervention                                              | Quantity of drinking (g/week) (2.3)                                                          |
| CD009586 (2016)                                | Asymptomatic patients over the age of 40 years                                                                                                                       | Systematic screening vs. routine practice                                    | Detection of new cases of atrial fibrillation (1.3)                                          |
|                                                |                                                                                                                                                                      | Opportunistic screening vs. routine practice                                 | Detection of new cases of atrial fibrillation (1.5)                                          |
|                                                |                                                                                                                                                                      | Systematic screening vs. opportunistic screening                             | Detection of new cases of atrial fibrillation (2.2)                                          |
| CD011834 (2015)                                | People not aiming to lose weight                                                                                                                                     | Reduced fat vs. usual fat diet                                               | Weight (2.3)                                                                                 |
| CD008980 (2013)                                | Patients with atrial fibrillation or atrial flutter, who were eligible for treatment with anticoagulants                                                             | Factor Xa inhibitors vs. vitamin K antagonists                               | Stroke and other systemic embolic events (10.1)                                              |
|                                                |                                                                                                                                                                      |                                                                              | Major bleeding (10.2)                                                                        |
| CD003082 (2013)                                | People with schizophrenia or similar serious, non-affective psychosis diagnosed by any criteria                                                                      | Haloperidol vs. placebo                                                      | Global state: Overall improvement: No marked global improvement, > 6-24 weeks (1.18)         |
| CD011317 (2015)                                | Sexually active people                                                                                                                                               | Home-based vs. clinic-based specimen collection                              | Proportion of individuals tested (1.3)                                                       |
| CD002316 (2012)                                | Adults or children discharged from an emergency department, or equivalent, following assessment and treatment for acute asthma                                       | Any inhaled corticosteroids plus oral corticosteroid vs. oral corticosteroid | Asthma relapse at 7-10 days (1.22)                                                           |
|                                                |                                                                                                                                                                      |                                                                              | Asthma relapse at 20-24 days (1.23)                                                          |
| CD009085 (2011)                                | Children under the age of 12 years at the time of the trials                                                                                                         | Intermittent iron supplementation vs. placebo                                | Haemoglobin (1.15)                                                                           |
|                                                |                                                                                                                                                                      |                                                                              | Anaemia (1.7)                                                                                |
| CD000443 (2012)                                | Patients who have been admitted to a hospital with a clinical diagnosis of stroke (defined as an acute focal neurological deficit caused by cerebrovascular disease) | Early supported discharge service vs. conventional care                      | Death or dependency (6.1)                                                                    |
|                                                |                                                                                                                                                                      |                                                                              | Length of stay (6.2)                                                                         |
| CD000515 (2012)                                | Patients of any age or either sex with symptomatic or asymptomatic carotid stenosis                                                                                  | Endovascular treatment vs. endarterectomy                                    | Death or any stroke between randomization and 30 days after treatment (1.3)                  |
| CD000984 (2012)                                | Fully qualified health professionals, working with overweight or obese adults                                                                                        | Reminders vs. standard care                                                  | Weight (kg) at longest follow up (3.1)                                                       |
| CD002142 (2005)                                | Individuals with histologically confirmed non-small cell lung cancer who had undergone complete resection                                                            | Surgery + postoperative radiotherapy vs. surgery alone                       | Survival (1.6)                                                                               |
| CD003382 (2013)                                | Patients aged 16 years and over with sexual dysfunction on any dose regime                                                                                           | Sildenafil vs. placebo                                                       | Clinical Global impression - Sexual function not "much/very much improved" by endpoint (1.4) |
|                                                |                                                                                                                                                                      |                                                                              | Endpoint Arizona Sexual Experience Scale (ASEX) total scores (1.5)                           |
| CD003550 (2006)                                | Sexually active couples engaging in heterosexual, vaginal intercourse and without contraindications to latex or non-latex condoms                                    | Bupropion vs. placebo                                                        | Endpoint Clinical Global Impression (CGI - SF) (3.8)                                         |
|                                                |                                                                                                                                                                      | eZ-on vs. Kimono Select (latex) condom                                       | Adverse genital experience (1.11, 1.12)                                                      |
|                                                |                                                                                                                                                                      |                                                                              | Preferred choice (1.13, 1.14)                                                                |
|                                                |                                                                                                                                                                      |                                                                              | Would recommend to a friend (1.15, 1.16)                                                     |
|                                                |                                                                                                                                                                      | Baggy Tactylon vs. standard USAID (latex) condom                             | Medical event (1.9, 1.10)                                                                    |
|                                                |                                                                                                                                                                      |                                                                              | Medical event (10.4, 10.5)                                                                   |
| Low-Modulus Tactylon vs. Aladan (latex) condom | Preference (11.7, 11.8)                                                                                                                                              |                                                                              |                                                                                              |
|                                                | Medical event (12.4, 12.5)                                                                                                                                           |                                                                              |                                                                                              |
|                                                | Preference (12.6, 12.7)                                                                                                                                              |                                                                              |                                                                                              |

|                 |                                                                                                                                                                                                                                                                                                                                 |                                                                               |                                                                       |
|-----------------|---------------------------------------------------------------------------------------------------------------------------------------------------------------------------------------------------------------------------------------------------------------------------------------------------------------------------------|-------------------------------------------------------------------------------|-----------------------------------------------------------------------|
|                 |                                                                                                                                                                                                                                                                                                                                 | Low-Modulus Tactylon vs. USAID (latex) condom                                 | Preference (13.7, 13.8)                                               |
|                 |                                                                                                                                                                                                                                                                                                                                 | eZ-on vs. Durex Gossamer (latex) condom                                       | "Excellent" or "good" acceptability (2.15, 2.16)                      |
|                 |                                                                                                                                                                                                                                                                                                                                 | Avanti vs. Durex Gossamer (latex) condom                                      | Preferred choice (2.17, 2.18)                                         |
|                 |                                                                                                                                                                                                                                                                                                                                 | Avanti vs. Ramses Sensitol (latex) condom                                     | "Excellent" or "good" acceptability (3.15, 3.16)                      |
|                 |                                                                                                                                                                                                                                                                                                                                 | Avanti vs. Trojan-Enz (latex)                                                 | Acceptability (4.11, 4.12)                                            |
|                 |                                                                                                                                                                                                                                                                                                                                 | Standard Tactylon vs. Aladan (latex) condom                                   | Preference (5.7, 6.8)                                                 |
|                 |                                                                                                                                                                                                                                                                                                                                 | Standard Tactylon vs. LifeStyles (latex) condom                               | Medical event (6.4, 6.5)                                              |
|                 |                                                                                                                                                                                                                                                                                                                                 | Standard Tactylon vs. Trojan-Enz                                              | Recommend (7.9, 7.10)                                                 |
|                 |                                                                                                                                                                                                                                                                                                                                 | Standard Tactylon vs. standard USAID (latex) condom                           | Preference (8.10, 8.11, 8.12, 8.13)                                   |
|                 |                                                                                                                                                                                                                                                                                                                                 |                                                                               | Recommend (8.14, 8.15)                                                |
|                 |                                                                                                                                                                                                                                                                                                                                 |                                                                               | Preference (9.7, 9.8)                                                 |
| CD004201 (2012) | All patients requiring long-term catheterization for urinary incontinence or retention that cannot be managed by another method                                                                                                                                                                                                 | Prophylactic antibiotic vs. antibiotic for laboratory urinary tract infection | At least one episode of definite symptomatic bacteriuria (5.8)        |
| CD004203 (2015) | Adults requiring short-term urethral catheterisation in a hospital for any reason such as urine monitoring, investigations, acute retention problems, and after surgery                                                                                                                                                         | Indwelling urethral vs. suprapubic catheterisation                            | Symptomatic urinary tract infection (1.1)                             |
|                 |                                                                                                                                                                                                                                                                                                                                 | Urethral vs. intermittent catheterisation                                     | Number of patients with discomfort (1.13)                             |
|                 |                                                                                                                                                                                                                                                                                                                                 |                                                                               | Asymptomatic bacteriuria (1.2)                                        |
|                 |                                                                                                                                                                                                                                                                                                                                 |                                                                               | Asymptomatic bacteriuria (2.2)                                        |
| CD005215 (2016) | Male and female adolescents aged 10 years to 19 years                                                                                                                                                                                                                                                                           | Contraceptive-promoting interventions vs. control                             | Initiation of sexual intercourse (5.2)                                |
| CD006626 (2011) | People with schizophrenia and other types of schizophrenia-like psychosis                                                                                                                                                                                                                                                       | Risperidone vs. Olanzapine                                                    | Adverse effects: 7b. Prolactin - change from baseline in ng/ml (4.28) |
| CD006778 (2010) | Patients of any age and either gender if they had signs and symptoms of aneurysmal subarachnoid haemorrhage with aneurysmal pattern on computerised tomography scan or an aneurysm shown by angiography                                                                                                                         | Tirilazad vs. control                                                         | Death from any cause at the end of the follow up (2.1)                |
|                 |                                                                                                                                                                                                                                                                                                                                 |                                                                               | Poor outcome at the end of follow up (2.2)                            |
| CD006944 (2010) | Healthy children and adolescents (age from one month to <20 years) with bone density outcomes                                                                                                                                                                                                                                   | Vitamin D supplementation vs. control                                         | % Change total body bone mineral content from baseline (5.1)          |
|                 |                                                                                                                                                                                                                                                                                                                                 |                                                                               | % Change hip bone mineral density from baseline (5.2)                 |
|                 |                                                                                                                                                                                                                                                                                                                                 |                                                                               | % Change lumbar spine bone mineral density from baseline (5.3)        |
|                 |                                                                                                                                                                                                                                                                                                                                 |                                                                               | % Change forearm bone mineral density from baseline (5.4)             |
| CD008107 (2013) | Overall population of participants in randomized controlled trials with the following criteria: 1) histologically confirmed adenocarcinoma of the stomach, GE junction, or esophagus, 2) previously untreated, 3) locoregionally advanced, 4) resectable based on staging exams, 5) absence of distant or peritoneal metastases | Perioperative chemo (radio) therapy vs. primary surgery                       | Overall survival (1.12)                                               |
| CD008203 (2014) | Healthy people, patients with diseases other than venous thromboembolism, or people with risk factor                                                                                                                                                                                                                            | Statin vs. placebo                                                            | Incidence of Venous Thromboembolism (1.6)                             |
| CD008524 (2010) | Children aged 6 months to 5 years                                                                                                                                                                                                                                                                                               | Vitamin A vs. control                                                         | Mortality (all-cause) at longest follow-up (1.3)                      |

|                 |                                                                                                                                                                                                                                                                                    |                                                                                                                    |                                                                                                 |
|-----------------|------------------------------------------------------------------------------------------------------------------------------------------------------------------------------------------------------------------------------------------------------------------------------------|--------------------------------------------------------------------------------------------------------------------|-------------------------------------------------------------------------------------------------|
| CD009149 (2013) | Children (aged below 18 years) or adults with any mental, neurological and substance-use seeking first-level care/primary care or who were detected in the community in low-and middle-income countries and carers of people with mental, neurological and substance-use disorders | Non-specialist health workers and other professionals with health roles vs. usual care in conducting interventions | Functional impairment (8.11)                                                                    |
|                 |                                                                                                                                                                                                                                                                                    |                                                                                                                    | Severity of PTSD symptoms (8.3)                                                                 |
|                 |                                                                                                                                                                                                                                                                                    |                                                                                                                    | Severity of depressive symptoms (8.6)                                                           |
|                 |                                                                                                                                                                                                                                                                                    |                                                                                                                    | Severity of anxiety symptoms (8.8)                                                              |
| CD009382 (2013) | Children under the age of 18 years                                                                                                                                                                                                                                                 | Water, sanitation, and hygiene intervention vs. control                                                            | Weight-for-height (2.3)                                                                         |
|                 |                                                                                                                                                                                                                                                                                    |                                                                                                                    | Weight-for-age (Fig. 11 = 1.3)                                                                  |
|                 |                                                                                                                                                                                                                                                                                    |                                                                                                                    | Height-for-age (Fig. 12 = 3.3)                                                                  |
| CD009532 (2014) | Healthy prospective first-time or repeat blood donors                                                                                                                                                                                                                              | Iron supplementation vs. placebo/control                                                                           | Deferral due to low haemoglobin: at first donation visit after commencement of treatment (10.1) |
|                 |                                                                                                                                                                                                                                                                                    |                                                                                                                    | Deferral due to low haemoglobin: cumulative deferrals over all visits (10.3)                    |
|                 |                                                                                                                                                                                                                                                                                    |                                                                                                                    | Haemoglobin (g/L): before further donation (10.4)                                               |
|                 |                                                                                                                                                                                                                                                                                    |                                                                                                                    | Serum ferritin (ng/mL): before further donation (10.5)                                          |
|                 |                                                                                                                                                                                                                                                                                    |                                                                                                                    | Serum ferritin (ng/mL): after subsequent donation(s) (10.6)                                     |
| CD009580 (2015) | People with at high recurrent risk of CVD events at stroke due to previous clinical manifestations of CVD (coronary heart disease or stroke)                                                                                                                                       | Fibrates vs. control                                                                                               | Primary outcome: non-fatal stroke, non-fatal myocardial infarction, and vascular death (3.1)    |
| CD009934 (2013) | Adults from the general population and adults at high risk for cardiovascular disease                                                                                                                                                                                              | All tea vs. control                                                                                                | Total Cholesterol (3.1)                                                                         |
|                 |                                                                                                                                                                                                                                                                                    |                                                                                                                    | LDL-Cholesterol (3.2)                                                                           |
|                 |                                                                                                                                                                                                                                                                                    |                                                                                                                    | HDL-Cholesterol (3.3)                                                                           |
|                 |                                                                                                                                                                                                                                                                                    |                                                                                                                    | Triglycerides (3.4)                                                                             |
| CD010037 (2015) | Normotensive people                                                                                                                                                                                                                                                                | Calcium supplementation/fortification vs. control                                                                  | Effect mean difference of systolic blood pressure (1.1)                                         |
|                 |                                                                                                                                                                                                                                                                                    |                                                                                                                    | Effect mean difference of diastolic blood pressure (1.2)                                        |
| CD010389 (2014) | Non-immunocompromised adults with anogenital warts                                                                                                                                                                                                                                 | Imiquimod vs. placebo                                                                                              | Complete regression after treatment (8.1)                                                       |
|                 |                                                                                                                                                                                                                                                                                    |                                                                                                                    | Partial regression after treatment (13.1)                                                       |
| CD011430 (2015) | Patients with early-stage non-small cell lung cancer who had undergone a potentially curative resection                                                                                                                                                                            | Surgery and chemotherapy vs. surgery                                                                               | Survival (Fig. 6)                                                                               |
|                 |                                                                                                                                                                                                                                                                                    | Surgery, radiotherapy and chemotherapy vs. surgery plus radiotherapy                                               | Survival (Fig. 9)                                                                               |
