# Supplementary material for: Sex based subgroup differences in randomized controlled trials: empirical evidence from Cochrane meta-analyses
Source: PubMed Central journal article supplement — BMJ. 2016 Nov 24;355:i5826. doi: 10.1136/bmj.i5826 (PMC5122320; doi:10.1136/bmj.i5826), 2016-11-24
Supplement: walj034559.wt2_default.pdf [file walj034559.wt2_default.pdf]

**Supplementary Table 2. Statistically significant sex-treatment interactions from the first published RCT that are not corroborated by cumulative meta-analyzed data (Standardized analyses<sup>a</sup> from topics with more than one RCT with data for both men and women)**

| CD Number | Comparison                                         | Outcome                                               | Results in first published RCT (95% CI)                                                                        | Results in meta-analysis (95% CI)                                                               | Results in meta-analysis excluding the first published RCT (95% CI)                                    |
|-----------|----------------------------------------------------|-------------------------------------------------------|----------------------------------------------------------------------------------------------------------------|-------------------------------------------------------------------------------------------------|--------------------------------------------------------------------------------------------------------|
| CD006778  | Tirilazad versus control                           | Death from any cause at the end of the follow-up      | Men: RR 0.52 (0.32 to 0.83)<br>Women: RR 1.09 (0.76 to 1.58)<br>Interaction p-value = 0.01                     | Men: RR 0.72 (0.35 to 1.49)<br>Women RR 0.95 (0.80 to 1.12)<br>Interaction p-value = 0.48       | Men: RR 1.09 (0.55 to 2.15)<br>Women RR 0.91 (0.75 to 1.10) <sup>b</sup><br>Interaction p-value = 0.61 |
| CD004815  | Invasive versus conservative <sup>c</sup>          | Intermediate death or non-fatal myocardial infarction | Men: RR 0.61 (0.47, 0.79)<br>Women: RR 1.26 (0.80 to 1.98)<br>Interaction p-value 0.006                        | Men: 0.74 (0.63, 0.86)<br>Women: RR 0.87 (0.65 to 1.16)<br>Interaction p-value 0.34             | Men: RR 0.80 (0.68 to 0.93)<br>Women RR0.78 (0.59 to 1.03)<br>Interaction p-value 0.91                 |
| CD011317  | Home-based versus clinic-based specimen collection | Proportion of individuals tested                      | Men: RR 129.15 (32.22, 517.74)<br>Women: RR 15.17 (11.04 to 20.85) <sup>d</sup><br>Interaction p-value = 0.003 | Men: RR 3.18 (1.69, 5.98)<br>Women: RR 2.09 (1.34 to 3.26)<br>Interaction p-value = 0.29        | Men: RR 1.82 (1.45 to 2.28)<br>Women: RR 1.44 (1.12 to 1.84)<br>Interaction p-value = 0.17             |
| CD002128  | Dietary advice versus Control                      | Total cholesterol                                     | Men: MD -0.30 (-0.53 to -0.07)<br>Women: MD 0.07 (-0.21 to 0.35)<br>Interaction p-value = 0.04                 | Men: MD -0.24 (-0.39 to -0.09)<br>Women: MD -0.02 (-0.23 to 0.19)<br>Interaction p-value = 0.08 | Men: MD -0.20 (-0.40 to -0.01)<br>Women: MD -0.14 (-0.46 to 0.19)<br>Interaction p-value = 0.74        |

MD = mean difference, RR = risk ratio

<sup>a</sup> All results are based on standardized calculations (using random effects (IV) model for a risk ratio or mean difference effect measure)

<sup>b</sup> Based on only one randomized controlled trial

<sup>c</sup> Early invasive versus conservative strategies for unstable angina and non-ST elevation myocardial infarction in the stent era

<sup>d</sup> Odds ratios from original meta-analysis: Women: 22.23 (95% CI 15.92 to 31.05), men: 171.44 (95% CI 42.54 to 691.19)
